# Supplementary material
Source: ML conference proceedings conference paper supplement (https://proceedings.neurips.cc/paper_files/paper/2021/hash/d7b76edf790923bf7177f7ebba5978df-Abstract.html)
Supplement: Supplementary file 1 [file d7b76edf790923bf7177f7ebba5978df-Supplemental.zip]

Archive with 116 entries (115 files):
- Appendix.pdf
- MME/examples/__init__.py
- MME/examples/__pycache__/__init__.cpython-35.pyc
- MME/examples/__pycache__/run_demme.cpython-35.pyc
- MME/examples/__pycache__/run_mme.cpython-35.pyc
- MME/examples/__pycache__/variants.cpython-35.pyc
- MME/examples/Render/
- MME/examples/run_demme.py
- MME/examples/run_mme.py
- MME/examples/variants.py
- MME/LICENSE.txt
- MME/mme/__init__.py
- MME/mme/__pycache__/__init__.cpython-35.pyc
- MME/mme/algos/__init__.py
- MME/mme/algos/__pycache__/__init__.cpython-35.pyc
- MME/mme/algos/__pycache__/base.cpython-35.pyc
- MME/mme/algos/__pycache__/demme.cpython-35.pyc
- MME/mme/algos/__pycache__/mme.cpython-35.pyc
- MME/mme/algos/base.py
- MME/mme/algos/demme.py
- MME/mme/algos/mme.py
- MME/mme/core/__init__.py
- MME/mme/core/__pycache__/__init__.cpython-35.pyc
- MME/mme/core/__pycache__/serializable.cpython-35.pyc
- MME/mme/core/serializable.py
- MME/mme/distributions/__init__.py
- MME/mme/distributions/__pycache__/__init__.cpython-35.pyc
- MME/mme/distributions/__pycache__/normal.cpython-35.pyc
- MME/mme/distributions/normal.py
- MME/mme/envs/__init__.py
- MME/mme/envs/__pycache__/__init__.cpython-35.pyc
- MME/mme/envs/__pycache__/EnvInterfaces.cpython-35.pyc
- MME/mme/envs/__pycache__/GridMap.cpython-35.pyc
- MME/mme/envs/__pycache__/gym_env.cpython-35.pyc
- MME/mme/envs/__pycache__/helpers.cpython-35.pyc
- MME/mme/envs/__pycache__/LineIntersection2D.cpython-35.pyc
- MME/mme/envs/__pycache__/mujoco_env.cpython-35.pyc
- MME/mme/envs/__pycache__/sparse_ant.cpython-35.pyc
- MME/mme/envs/__pycache__/sparse_halfcheetah.cpython-35.pyc
- MME/mme/envs/__pycache__/sparse_hopper.cpython-35.pyc
- MME/mme/envs/__pycache__/sparse_walker2d.cpython-35.pyc
- MME/mme/envs/__pycache__/task.cpython-35.pyc
- MME/mme/envs/assets/ant.xml
- MME/mme/envs/assets/ant_maze.xml
- MME/mme/envs/assets/half_cheetah.xml
- MME/mme/envs/assets/hopper.xml
- MME/mme/envs/assets/humanoid.xml
- MME/mme/envs/assets/humanoidstandup.xml
- MME/mme/envs/assets/inverted_double_pendulum.xml
- MME/mme/envs/assets/inverted_pendulum.xml
- MME/mme/envs/assets/muj_imgs/n0.png
- MME/mme/envs/assets/muj_imgs/n10.png
- MME/mme/envs/assets/muj_imgs/n10min.png
- MME/mme/envs/assets/muj_imgs/n15.png
- MME/mme/envs/assets/muj_imgs/n20.png
- MME/mme/envs/assets/muj_imgs/n25.png
- MME/mme/envs/assets/muj_imgs/n30.png
- MME/mme/envs/assets/muj_imgs/n5.png
- MME/mme/envs/assets/muj_imgs/n5min.png
- MME/mme/envs/assets/point.xml
- MME/mme/envs/assets/reacher.xml
- MME/mme/envs/assets/swimmer.xml
- MME/mme/envs/assets/walker2d.xml
- MME/mme/envs/EnvInterfaces.py
- MME/mme/envs/GridMap.py
- MME/mme/envs/gym_env.py
- MME/mme/envs/helpers.py
- MME/mme/envs/LineIntersection2D.py
- MME/mme/envs/mujoco_env.py
- MME/mme/envs/sparse_ant.py
- MME/mme/envs/sparse_halfcheetah.py
- MME/mme/envs/sparse_hopper.py
- MME/mme/envs/sparse_walker2d.py
- MME/mme/envs/task.py
- MME/mme/misc/__init__.py
- MME/mme/misc/__pycache__/__init__.cpython-35.pyc
- MME/mme/misc/__pycache__/instrument.cpython-35.pyc
- MME/mme/misc/__pycache__/mlp.cpython-35.pyc
- MME/mme/misc/__pycache__/sampler.cpython-35.pyc
- MME/mme/misc/__pycache__/tf_utils.cpython-35.pyc
- MME/mme/misc/__pycache__/utils.cpython-35.pyc
- MME/mme/misc/instrument.py
- MME/mme/misc/mlp.py
- MME/mme/misc/plotter.py
- MME/mme/misc/remote_sampler.py
- MME/mme/misc/replay_pool.py
- MME/mme/misc/sampler.py
- MME/mme/misc/tf_utils.py
- MME/mme/misc/utils.py
- MME/mme/mujoco_models/ant_big_maze.xml
- MME/mme/mujoco_models/cross_maze_ant.xml
- MME/mme/mujoco_models/cross_maze_ant2.xml
- MME/mme/mujoco_models/simple_maze_ant.xml
- MME/mme/policies/__init__.py
- MME/mme/policies/__pycache__/__init__.cpython-35.pyc
- MME/mme/policies/__pycache__/gaussian_policy.cpython-35.pyc
- MME/mme/policies/__pycache__/nn_policy.cpython-35.pyc
- MME/mme/policies/__pycache__/uniform_policy.cpython-35.pyc
- MME/mme/policies/gaussian_policy.py
- MME/mme/policies/nn_policy.py
- MME/mme/policies/uniform_policy.py
- MME/mme/preprocessors/__init__.py
- MME/mme/preprocessors/__pycache__/__init__.cpython-35.pyc
- MME/mme/preprocessors/__pycache__/mlp_preprocessor.cpython-35.pyc
- MME/mme/preprocessors/mlp_preprocessor.py
- MME/mme/replay_buffers/__init__.py
- MME/mme/replay_buffers/__pycache__/__init__.cpython-35.pyc
- MME/mme/replay_buffers/__pycache__/replay_buffer.cpython-35.pyc
- MME/mme/replay_buffers/__pycache__/simple_replay_buffer.cpython-35.pyc
- MME/mme/replay_buffers/replay_buffer.py
- MME/mme/replay_buffers/simple_replay_buffer.py
- MME/mme/value_functions/__init__.py
- MME/mme/value_functions/__pycache__/__init__.cpython-35.pyc
- MME/mme/value_functions/__pycache__/value_function.cpython-35.pyc
- MME/mme/value_functions/value_function.py
- MME/README.md
