# Supplementary material
Source: ML conference proceedings conference paper supplement (https://proceedings.neurips.cc/paper_files/paper/2021/hash/d7b76edf790923bf7177f7ebba5978df-Abstract.html)
Supplement: Supplementary file 1 [file d7b76edf790923bf7177f7ebba5978df-Supplemental.zip › MME/mme/core/serializable.py]

from rllab.core.serializable import Serializable


def deep_clone(obj):
    assert isinstance(obj, Serializable)

    def maybe_deep_clone(o):
        if isinstance(o, Serializable):
            return deep_clone(o)
        else:
            return o

    d = obj.__getstate__()
    for key, val in d.items():
        d[key] = maybe_deep_clone(val)

    d['__args'] = list(d['__args'])  # Make args mutable.
    for i, val in enumerate(d['__args']):
        d['__args'][i] = maybe_deep_clone(val)

    for key, val in d['__kwargs'].items():
        d['__kwargs'][key] = maybe_deep_clone(val)

    out = type(obj).__new__(type(obj))
    # noinspection PyArgumentList
    out.__setstate__(d)

    return out
