# Supplementary material
Source: ML conference proceedings conference paper supplement (https://proceedings.neurips.cc/paper_files/paper/2021/hash/d7b76edf790923bf7177f7ebba5978df-Abstract.html)
Supplement: Supplementary file 1 [file d7b76edf790923bf7177f7ebba5978df-Supplemental.zip › MME/mme/envs/__init__.py]

from gym.envs.registration import register

register(
    id='SparseHalfCheetah-v1',
    entry_point='mme.envs.sparse_halfcheetah:SparseHalfCheetahEnv',
    max_episode_steps=1000,
    reward_threshold=4800.0,
)

register(
    id='SparseHopper-v1',
    entry_point='mme.envs.sparse_hopper:SparseHopperEnv',
    max_episode_steps=1000,
    reward_threshold=3800.0,
)

register(
    id='SparseWalker2d-v1',
    max_episode_steps=1000,
    entry_point='mme.envs.sparse_walker2d:SparseWalker2dEnv',
)

register(
    id='SparseAnt-v1',
    entry_point='mme.envs.sparse_ant:SparseAntEnv',
    max_episode_steps=1000,
    reward_threshold=6000.0,
)

from .gym_env import GymEnv, GymEnvDelayed
from .EnvInterfaces import GME_NP_pure
