# Supplementary material
Source: ML conference proceedings conference paper supplement (https://proceedings.neurips.cc/paper_files/paper/2021/hash/d7b76edf790923bf7177f7ebba5978df-Abstract.html)
Supplement: Supplementary file 1 [file d7b76edf790923bf7177f7ebba5978df-Supplemental.zip › MME/mme/envs/assets/inverted_double_pendulum.xml]

<!-- Cartpole Model

    The state space is populated with joints in the order that they are
    defined in this file. The actuators also operate on joints.

    State-Space (name/joint/parameter):
        - cart      slider      position (m)
        - pole      hinge       angle (rad)
        - cart      slider      velocity (m/s)
        - pole      hinge       angular velocity (rad/s)

    Actuators (name/actuator/parameter):
        - cart      motor       force x (N)

-->
<mujoco model="cartpole">
  <compiler coordinate="local" inertiafromgeom="true"/>
  <custom>
    <numeric data="2" name="frame_skip"/>
  </custom>
  <default>
    <joint damping="0.05"/>
    <geom contype="0" friction="1 0.1 0.1" rgba="0.7 0.7 0 1"/>
  </default>
  <option gravity="1e-5 0 -9.81" integrator="RK4" timestep="0.01"/>
  <size nstack="3000"/>
  <worldbody>
    <geom name="floor" pos="0 0 -3.0" rgba="0.8 0.9 0.8 1" size="40 40 40" type="plane"/>
    <geom name="rail" pos="0 0 0" quat="0.707 0 0.707 0" rgba="0.3 0.3 0.7 1" size="0.02 1" type="capsule"/>
    <body name="cart" pos="0 0 0">
      <joint axis="1 0 0" limited="true" margin="0.01" name="slider" pos="0 0 0" range="-1 1" type="slide"/>
      <geom name="cart" pos="0 0 0" quat="0.707 0 0.707 0" size="0.1 0.1" type="capsule"/>
      <body name="pole" pos="0 0 0">
        <joint axis="0 1 0" name="hinge" pos="0 0 0" type="hinge"/>
        <geom fromto="0 0 0 0 0 0.6" name="cpole" rgba="0 0.7 0.7 1" size="0.045 0.3" type="capsule"/>
        <body name="pole2" pos="0 0 0.6">
          <joint axis="0 1 0" name="hinge2" pos="0 0 0" type="hinge"/>
          <geom fromto="0 0 0 0 0 0.6" name="cpole2" rgba="0 0.7 0.7 1" size="0.045 0.3" type="capsule"/>
          <site name="tip" pos="0 0 .6" size="0.01 0.01"/>
        </body>
      </body>
    </body>
  </worldbody>
  <actuator>
    <motor ctrllimited="true" ctrlrange="-1 1" gear="500" joint="slider" name="slide"/>
  </actuator>
</mujoco>
