# Supplementary material
Source: ML conference proceedings conference paper supplement (https://proceedings.neurips.cc/paper_files/paper/2021/hash/d7b76edf790923bf7177f7ebba5978df-Abstract.html)
Supplement: Supplementary file 1 [file d7b76edf790923bf7177f7ebba5978df-Supplemental.zip › MME/mme/envs/assets/inverted_pendulum.xml]

<mujoco model="cartpole">
	<compiler inertiafromgeom="true"/>
	<default>
		<joint armature="0" damping="1" limited="true"/>
		<geom contype="0" friction="1 0.1 0.1" rgba="0.7 0.7 0 1"/>
		<tendon/>
		<motor ctrlrange="-3 3" ctrllimited='true'/>
	</default>
    <asset>
		<texture type="skybox" builtin="checker" rgb1="1 1 1" rgb2="1 1 1"
                    width="256" height="256"/>
        <texture name="texgeom" type="cube" builtin="flat" mark="cross" width="127" height="1278" rgb1="0.8 0.6 0.4" rgb2="0.8 0.6 0.4" markrgb="1 1 1" random="0.01" />
		<texture name="texplane" type="2d" builtin="checker" rgb1=".5 .5 .5" rgb2=".5 .5 .5" width="100" height="100" />
        <texture name="texplane_show" type="2d" builtin="checker" rgb1="0 0 0" rgb2="0.9 0.9 0.9" width="100" height="100" />
        <material name='MatPlane' texture="texplane" shininess="1" texrepeat="30 30" specular="1"  reflectance="0.5" />
        <material name='geom' texture="texgeom" texuniform="true" />
 	</asset>
	<option gravity="0 0 -9.81" integrator="RK4" timestep="0.02"/>
	<size nstack="3000"/>
	<worldbody>
		<geom name="rail" pos="0 0 0" quat="0.707 0 0.707 0" rgba="0.3 0.3 0.7 1" size="0.02 3" type="capsule"/>
		<body name="cart" pos="0 0 0">
			<joint axis="1 0 0" limited="true" name="slider" pos="0 0 0" range="-2.5 2.5" type="slide"/>
			<geom name="cart" pos="0 0 0" quat="0.707 0 0.707 0" size="0.1 0.1" type="capsule"/>
			<body name="pole" pos="0 0 0">
				<joint axis="0 1 0" limited="false" name="hinge" pos="0 0 0" range="-180 180" type="hinge"/>
				<geom fromto="0 0 0 0.001 0 -0.6" name="cpole" rgba="0 0.7 0.7 1" size="0.049 0.3" type="capsule"/>
			</body>
		</body>
	</worldbody>
	<actuator>
		<motor gear="100" joint="slider" name="slide"/>
	</actuator>
</mujoco>
