# Supplementary material
Source: ML conference proceedings conference paper supplement (https://proceedings.neurips.cc/paper_files/paper/2021/hash/d7b76edf790923bf7177f7ebba5978df-Abstract.html)
Supplement: Supplementary file 1 [file d7b76edf790923bf7177f7ebba5978df-Supplemental.zip › MME/mme/envs/gym_env.py]

""" Rllab implementation with a HACK. See comment in GymEnv.__init__(). """
import gym
import gym.wrappers
import gym.envs
import gym.spaces
import traceback
import logging

try:
    from gym.wrappers.monitoring import logger as monitor_logger

    monitor_logger.setLevel(logging.WARNING)
except Exception as e:
    traceback.print_exc()

import os
import os.path as osp
from rllab.envs.base import Env, Step
from rllab.core.serializable import Serializable
from rllab.spaces.box import Box
from rllab.spaces.discrete import Discrete
from rllab.spaces.product import Product
from rllab.misc import logger


def convert_gym_space(space):
    if isinstance(space, gym.spaces.Box):
        return Box(low=space.low, high=space.high)
    elif isinstance(space, gym.spaces.Discrete):
        return Discrete(n=space.n)
    elif isinstance(space, gym.spaces.Tuple):
        return Product([convert_gym_space(x) for x in space.spaces])
    else:
        raise NotImplementedError


class CappedCubicVideoSchedule(object):
    # Copied from gym, since this method is frequently moved around
    def __call__(self, count):
        if count < 1000:
            return int(round(count ** (1. / 3))) ** 3 == count
        else:
            return count % 1000 == 0


class FixedIntervalVideoSchedule(object):
    def __init__(self, interval):
        self.interval = interval

    def __call__(self, count):
        return count % self.interval == 0


class NoVideoSchedule(object):
    def __call__(self, count):
        return False


class GymEnv(Env, Serializable):
    def __init__(self, env_name, record_video=False, video_schedule=None, log_dir=None, record_log=False,
                 force_reset=True):
        if log_dir is None:
            if logger.get_snapshot_dir() is None:
                logger.log("Warning: skipping Gym environment monitoring since snapshot_dir not configured.")
            else:
                log_dir = os.path.join(logger.get_snapshot_dir(), "gym_log")
        Serializable.quick_init(self, locals())

        env = gym.envs.make(env_name)

        # HACK: Gets rid of the TimeLimit wrapper that sets 'done = True' when
        # the time limit specified for each environment has been passed and
        # therefore the environment is not Markovian (terminal condition depends
        # on time rather than state).
        env = env.env

        self.env = env
        self.env_id = env.spec.id

        assert not (not record_log and record_video)

        if log_dir is None or record_log is False:
            self.monitoring = False
        else:
            if not record_video:
                video_schedule = NoVideoSchedule()
            else:
                if video_schedule is None:
                    video_schedule = CappedCubicVideoSchedule()
            self.env = gym.wrappers.Monitor(self.env, log_dir, video_callable=video_schedule, force=True)
            self.monitoring = True

        self._observation_space = convert_gym_space(env.observation_space)
        logger.log("observation space: {}".format(self._observation_space))
        self._action_space = convert_gym_space(env.action_space)
        logger.log("action space: {}".format(self._action_space))
        self._horizon = env.spec.tags['wrapper_config.TimeLimit.max_episode_steps']
        self._log_dir = log_dir
        self._force_reset = force_reset

    @property
    def observation_space(self):
        return self._observation_space

    @property
    def action_space(self):
        return self._action_space

    @property
    def horizon(self):
        return self._horizon


    @property
    def get_state(self):
        return self.env.state_vector()

    def reset(self):
        if self._force_reset and self.monitoring:
            from gym.wrappers.monitoring import Monitor
            assert isinstance(self.env, Monitor)
            recorder = self.env.stats_recorder
            if recorder is not None:
                recorder.done = True
        return self.env.reset()

    def step(self, action):
        next_obs, reward, done, info = self.env.step(action)
        return Step(next_obs, reward, done, **info)

    def render(self, mode='human', close=False):
        return self.env._render(mode, close)
        # self.env.render()

    def terminate(self):
        if self.monitoring:
            self.env._close()
            if self._log_dir is not None:
                print("""
    ***************************

    Training finished! You can upload results to OpenAI Gym by running the following command:

    python scripts/submit_gym.py %s

    ***************************
                """ % self._log_dir)


class GymEnvDelayed(Env, Serializable):
    def __init__(self, env_name, record_video=False, video_schedule=None, log_dir=None, record_log=False,
                 force_reset=True, delay=0):
        if log_dir is None:
            if logger.get_snapshot_dir() is None:
                logger.log("Warning: skipping Gym environment monitoring since snapshot_dir not configured.")
            else:
                log_dir = os.path.join(logger.get_snapshot_dir(), "gym_log")
        Serializable.quick_init(self, locals())

        env = gym.envs.make(env_name)

        # HACK: Gets rid of the TimeLimit wrapper that sets 'done = True' when
        # the time limit specified for each environment has been passed and
        # therefore the environment is not Markovian (terminal condition depends
        # on time rather than state).
        env = env.env

        self.env = env
        self.env_id = env.spec.id
        self.time = 0
        self.delay = delay
        self.delayed_reward = 0

        assert not (not record_log and record_video)

        if log_dir is None or record_log is False:
            self.monitoring = False
        else:
            if not record_video:
                video_schedule = NoVideoSchedule()
            else:
                if video_schedule is None:
                    video_schedule = CappedCubicVideoSchedule()
            self.env = gym.wrappers.Monitor(self.env, log_dir, video_callable=video_schedule, force=True)
            self.monitoring = True

        self._observation_space = convert_gym_space(env.observation_space)
        logger.log("observation space: {}".format(self._observation_space))
        self._action_space = convert_gym_space(env.action_space)
        logger.log("action space: {}".format(self._action_space))
        self._horizon = env.spec.tags['wrapper_config.TimeLimit.max_episode_steps']
        self._log_dir = log_dir
        self._force_reset = force_reset

    @property
    def observation_space(self):
        return self._observation_space

    @property
    def action_space(self):
        return self._action_space

    @property
    def horizon(self):
        return self._horizon

    def reset(self):
        if self._force_reset and self.monitoring:
            from gym.wrappers.monitoring import Monitor
            assert isinstance(self.env, Monitor)
            recorder = self.env.stats_recorder
            if recorder is not None:
                recorder.done = True
        self.time = 0
        self.delayed_reward = 0
        return self.env.reset()

    def step(self, action):
        next_obs, reward, done, info = self.env.step(action)
        self.delayed_reward = self.delayed_reward + reward
        reward = 0
        self.time += 1
        if (self.time == self.delay) or done:
            reward = self.delayed_reward + 0.0
            self.delayed_reward = 0
            self.time = 0
        return Step(next_obs, reward, done, **info)

    def render(self, mode='human', close=False):
        return self.env._render(mode, close)
        # self.env.render()

    def terminate(self):
        if self.monitoring:
            self.env._close()
            if self._log_dir is not None:
                print("""
    ***************************

    Training finished! You can upload results to OpenAI Gym by running the following command:

    python scripts/submit_gym.py %s

    ***************************
                """ % self._log_dir)
