# Supplementary material
Source: ML conference proceedings conference paper supplement (https://proceedings.neurips.cc/paper_files/paper/2021/hash/d7b76edf790923bf7177f7ebba5978df-Abstract.html)
Supplement: Supplementary file 1 [file d7b76edf790923bf7177f7ebba5978df-Supplemental.zip › MME/mme/envs/sparse_halfcheetah.py]

import numpy as np
from gym import utils
from mme.envs.mujoco_env import MujocoEnv


class SparseHalfCheetahEnv(MujocoEnv, utils.EzPickle):
    def __init__(self):
        MujocoEnv.__init__(self, 'half_cheetah.xml', 5)
        utils.EzPickle.__init__(self)

    def _step(self, action):
        xposbefore = self.model.data.qpos[0, 0]
        self.do_simulation(action, self.frame_skip)
        xposafter = self.model.data.qpos[0, 0]
        ob = self._get_obs()

        # --------- Dense Reward ---------
        # reward_ctrl = - 0.1 * np.square(action).sum()
        # reward_run = (xposafter - xposbefore) / self.dt
        # reward = reward_ctrl + reward_run

        # --------- Sparse Reward ---------
        # a reward +1 is given for every time the agent moves forward over a specific number of units.
        if xposafter - self.init_qpos[0] > 5.:
            reward=1.
        else:
            reward=0.
        done = False

        return ob, reward, done, {}

    def _get_obs(self):
        return np.concatenate([
            self.model.data.qpos.flat[1:],
            self.model.data.qvel.flat,
        ])

    def reset_model(self):
        qpos = self.init_qpos + self.np_random.uniform(low=-.1, high=.1, size=self.model.nq)
        qvel = self.init_qvel + self.np_random.randn(self.model.nv) * .1
        self.set_state(qpos, qvel)
        return self._get_obs()

    def viewer_setup(self):
        self.viewer.cam.distance = self.model.stat.extent * 0.3
