# Supplementary material
Source: ML conference proceedings conference paper supplement (https://proceedings.neurips.cc/paper_files/paper/2021/hash/d7b76edf790923bf7177f7ebba5978df-Abstract.html)
Supplement: Supplementary file 1 [file d7b76edf790923bf7177f7ebba5978df-Supplemental.zip › MME/mme/envs/task.py]

class RewardFunction:
    def __call__(self, state, action, next_state):
        raise NotImplementedError


class Task:
    def __init__(self, measure, reward_function):
        self.measure = measure
        self.reward_function = reward_function

class Measure:
    def __call__(self, states, actions, next_states, next_state_means, next_state_vars, model):
        """
        compute utilities of each policy
        Args:
            states: (n_actors, d_state)
            actions: (n_actors, d_action)
            next_state_means: (n_actors, ensemble_size, d_state)
            next_state_vars: (n_actors, ensemble_size, d_state)
        Returns:
            utility: (n_actors)
        """

        raise NotImplementedError
