# Supplementary material
Source: ML conference proceedings conference paper supplement (https://proceedings.neurips.cc/paper_files/paper/2021/hash/d7b76edf790923bf7177f7ebba5978df-Abstract.html)
Supplement: Supplementary file 1 [file d7b76edf790923bf7177f7ebba5978df-Supplemental.zip › MME/mme/misc/instrument.py]

import os
import uuid

from rllab.misc.instrument import run_experiment_lite
from mme.misc.utils import timestamp

from mme.misc.utils import PROJECT_PATH

DEFAULT_LOG_DIR = PROJECT_PATH + "/data"

def _create_symlink(folder):
    # Create a symbolic link that points to the mme folder and include it
    # in the tarball.

    # Unique filename for the symlink.
    include_path = os.path.join('/tmp/', str(uuid.uuid4()))
    os.makedirs(include_path)

    os.symlink(os.path.join(PROJECT_PATH, folder),
               os.path.join(include_path, folder))

    return include_path


def run_sac_experiment(main, mode, include_folders=None, log_dir=None,
                       exp_prefix="experiment", exp_name=None, **kwargs):
    if exp_name is None:
        exp_name = timestamp()

    if log_dir is None:
        log_dir = os.path.join(
            DEFAULT_LOG_DIR,
            "local",
            exp_prefix.replace("_", "-"),
            exp_name,
            "iter"+str(kwargs["seed"]))
    else:
        log_dir = os.path.join(log_dir, "iter" + str(kwargs["seed"]))

    if include_folders is None:
        include_folders = list()

    if mode == 'ec2':
        include_folders.append('mme')
        all_symlinks = list()

        for folder in include_folders:
            all_symlinks.append(_create_symlink(folder))

        kwargs.update(added_project_directories=all_symlinks)

    run_experiment_lite(
        stub_method_call=main,
        mode=mode,
        exp_prefix=exp_prefix,
        exp_name=exp_name,
        log_dir=log_dir,
        **kwargs,
    )
