# Supplementary material
Source: ML conference proceedings conference paper supplement (https://proceedings.neurips.cc/paper_files/paper/2021/hash/d7b76edf790923bf7177f7ebba5978df-Abstract.html)
Supplement: Supplementary file 1 [file d7b76edf790923bf7177f7ebba5978df-Supplemental.zip › MME/mme/misc/mlp.py]

import tensorflow as tf

from rllab.core.serializable import Serializable

from sandbox.rocky.tf.core.parameterized import Parameterized
from mme.misc import tf_utils

WEIGHT_DEFAULT_NAME = "weights"
BIAS_DEFAULT_NAME = "bias"


def _weight_variable(
        shape,
        initializer=None,
        name=WEIGHT_DEFAULT_NAME,
):
    """
    Returns a variable with a given shape.

    :param initializer: TensorFlow initializer. Default Xavier.
    :param name: Variable name.
    :param shape: Variable shape.
    """
    if initializer is None:
        initializer = tf.contrib.layers.xavier_initializer()

    var = tf.get_variable(name, shape, initializer=initializer)
    return var


def _bias_variable(
        shape,
        initializer=None,
        name=BIAS_DEFAULT_NAME,
):
    """
    Returns a bias variable with a given shape.

    :param initializer: TensorFlow initializer. Default zero.
    :param name: Variable name.
    :param shape: Variable shape.
    """
    if initializer is None:
        initializer = tf.constant_initializer(0.)

    return _weight_variable(shape,
                            initializer=initializer,
                            name=name)


def affine(
        inp,
        units,
        bias=True,
        W_initializer=None,
        b_initializer=None,
        W_name=WEIGHT_DEFAULT_NAME,
        bias_name=BIAS_DEFAULT_NAME,
):
    """ Creates an affine layer.

    :param inp: Input tensor.
    :param units: Number of units.
    :param bias: Include bias term.
    :param W_initializer: Initializer for the multiplicative weight.
    :param b_initializer: Initializer for the bias term.
    :param W_name: Name of the weight.
    :param bias_name: Name of the bias.
    :return: Tensor defined as input.dot(weight) + bias.
    """
    input_size = inp.get_shape()[-1].value
    W = _weight_variable([input_size, units],
                         initializer=W_initializer,
                         name=W_name)

    output = tf.matmul(inp, W)

    if bias:
        b = _bias_variable((units,),
                           initializer=b_initializer,
                           name=bias_name)

        output += b

    return output


def mlp(inputs,
        layer_sizes,
        nonlinearity=tf.nn.relu,
        output_nonlinearity=tf.nn.tanh,
        W_initializer=None,
        b_initializer=None):
    """
    Creates a multi-layer perceptron with given hidden sizes. A nonlinearity
    is applied after every hidden layer.

    Supports input tensors of rank 2 and rank 3. All inputs should have the same
    tensor rank. It is assumed that the vectors along the last axis are the
    data points, and an mlp is applied independently to each leading dimension.
    If multiple inputs are provided, then the corresponding rank-1 vectors
    are concatenated along the last axis. The leading dimensions of the network
    output are equal to the 'outer product' of the inputs' shapes.

    Example:

    input 1 shape: N x K x D1
    input 2 shape: N x 1 x D2

    output shape: N x K x (number of output units)

    :param inputs: List of input tensors.
    :param layer_sizes: List of layers sizes, including output layer size.
    :param nonlinearity: Hidden layer nonlinearity.
    :param output_nonlinearity: Output layer nonlinearity.
    :param W_initializer: Weight initializer.
    :param b_initializer: Bias initializer.
    :return:
    """
    if type(inputs) is tf.Tensor:
        inputs = [inputs]

    squeeze_output = False
    if layer_sizes[-1] is None:
        squeeze_output = True
        layer_sizes = list(layer_sizes)
        layer_sizes[-1] = 1

    # Take care of the input layer separately to make use of broadcasting in
    # a case of several input tensors.
    with tf.variable_scope('layer0'):
        layer = _bias_variable(layer_sizes[0], b_initializer)
        for i, inp in enumerate(inputs):
            with tf.variable_scope('input' + str(i)):
                layer += affine(
                    inp=inp,
                    units=layer_sizes[0],
                    bias=False,
                    W_initializer=W_initializer,
                    b_initializer=b_initializer
                )

        layer = nonlinearity(layer)

    for i_layer, size in enumerate(layer_sizes[1:], 1):
        with tf.variable_scope('layer{0}'.format(i_layer)):
            layer = affine(layer, size,
                           W_initializer=W_initializer,
                           b_initializer=b_initializer)
            if i_layer < len(layer_sizes) - 1:
                layer = nonlinearity(layer)

    if output_nonlinearity is not None:
        layer = output_nonlinearity(layer)

    if squeeze_output:
        layer = tf.squeeze(layer, axis=-1)

    return layer


def _weight_variable_alpha(
        shape,
        initializer=None,
        name=WEIGHT_DEFAULT_NAME,
        regularizer=None,
):
    """
    Returns a variable with a given shape.

    :param initializer: TensorFlow initializer. Default Xavier.
    :param name: Variable name.
    :param shape: Variable shape.
    """
    if initializer is None:
        initializer = tf.contrib.layers.xavier_initializer()

    var = tf.get_variable(name, shape, initializer=initializer, regularizer=regularizer)
    return var


def _bias_variable_alpha(
        shape,
        initializer=None,
        name=BIAS_DEFAULT_NAME,
        regularizer=None,
):
    """
    Returns a bias variable with a given shape.

    :param initializer: TensorFlow initializer. Default zero.
    :param name: Variable name.
    :param shape: Variable shape.
    """
    if initializer is None:
        initializer = tf.constant_initializer(0.)

    return _weight_variable_alpha(shape,
                            initializer=initializer,
                            name=name,
                            regularizer=regularizer)


class MLPFunction(Parameterized, Serializable):

    def __init__(self, name, input_pls, hidden_layer_sizes,
                 output_nonlinearity=None):
        Parameterized.__init__(self)
        Serializable.quick_init(self, locals())

        self._name = name
        self._input_pls = input_pls
        self._layer_sizes = list(hidden_layer_sizes) + [None]
        self._output_nonlinearity = output_nonlinearity
        self._output_t = self.get_output_for(*self._input_pls)

    def get_output_for(self, *inputs, reuse=False):
        with tf.variable_scope(self._name, reuse=reuse):
            value_t = mlp(
                inputs=inputs,
                output_nonlinearity=self._output_nonlinearity,
                layer_sizes=self._layer_sizes,
            )  # N

        return value_t

    def eval(self, *inputs):
        feeds = {pl: val for pl, val in zip(self._input_pls, inputs)}

        return tf_utils.get_default_session().run(self._output_t, feeds)

    def get_params_internal(self, **tags):
        if len(tags) > 0:
            raise NotImplementedError

        scope = tf.get_variable_scope().name
        scope += '/' + self._name + '/' if len(scope) else self._name + '/'

        return tf.get_collection(
            tf.GraphKeys.TRAINABLE_VARIABLES, scope=scope
        )
