# Supplementary material
Source: ML conference proceedings conference paper supplement (https://proceedings.neurips.cc/paper_files/paper/2021/hash/d7b76edf790923bf7177f7ebba5978df-Abstract.html)
Supplement: Supplementary file 1 [file d7b76edf790923bf7177f7ebba5978df-Supplemental.zip › MME/mme/misc/tf_utils.py]

import tensorflow as tf
from rllab import config


def get_default_session():
    return tf.get_default_session() or create_session()


def create_session(**kwargs):
    """ Create new tensorflow session with given configuration. """
    if "config" not in kwargs:
        kwargs["config"] = get_configuration()
    return tf.InteractiveSession(**kwargs)


def get_configuration():
    """ Returns personal tensorflow configuration. """
    if config.USE_GPU:
        raise NotImplementedError

    config_args = dict()
    return tf.ConfigProto(**config_args)
