# Supplementary material
Source: ML conference proceedings conference paper supplement (https://proceedings.neurips.cc/paper_files/paper/2021/hash/d7b76edf790923bf7177f7ebba5978df-Abstract.html)
Supplement: Supplementary file 1 [file d7b76edf790923bf7177f7ebba5978df-Supplemental.zip › MME/mme/misc/utils.py]

import collections
import datetime
import dateutil.tz
import os
import numpy as np

PROJECT_PATH = os.path.dirname(
    os.path.realpath(os.path.join(__file__, '..', '..')))

def timestamp():
    now = datetime.datetime.now(dateutil.tz.tzlocal())
    return now.strftime('%Y-%m-%d-%H-%M-%S-%f-%Z')

def deep_update(d, u):
    for k, v in u.items():
        d[k] = (
            deep_update(d.get(k, {}), v)
            if isinstance(v, collections.Mapping)
            else v)

    return d

def get_git_rev():
    try:
        import git
        repo = git.Repo(os.getcwd())
        git_rev = repo.active_branch.commit.name_rev
    except:
        git_rev = None

    return git_rev

def flatten(unflattened, parent_key='', separator='.'):
    items = []
    for k, v in unflattened.items():
        if separator in k:
            raise ValueError(
                "Found separator ({}) from key ({})".format(separator, k))
        new_key = parent_key + separator + k if parent_key else k
        if isinstance(v, collections.MutableMapping) and v:
            items.extend(flatten(v, new_key, separator=separator).items())
        else:
            items.append((new_key, v))

    return dict(items)

def unflatten(flattened, separator='.'):
    result = {}
    for key, value in flattened.items():
        parts = key.split(separator)
        d = result
        for part in parts[:-1]:
            if part not in d:
                d[part] = {}
            d = d[part]
        d[parts[-1]] = value

    return result

def concat_obs_z(obs, z, num_skills):
    """Concatenates the observation to a one-hot encoding of Z."""
    assert np.isscalar(z)
    z_one_hot = np.zeros(num_skills)
    z_one_hot[z] = 1
    return np.hstack([obs, z_one_hot])

def split_aug_obs(aug_obs, num_skills):
    """Splits an augmented observation into the observation and Z."""
    (obs, z_one_hot) = (aug_obs[:-num_skills], aug_obs[-num_skills:])
    z = np.where(z_one_hot == 1)[0][0]
    return (obs, z)

def _make_dir(filename):
    folder = os.path.dirname(filename)
    if not os.path.exists(folder):
        os.makedirs(folder)

def _save_video(paths, filename):
    import cv2
    assert all(['ims' in path for path in paths])
    ims = [im for path in paths for im in path['ims']]
    _make_dir(filename)

    # Define the codec and create VideoWriter object
    fourcc = cv2.VideoWriter_fourcc(*'MJPG')
    fps = 30.0
    (height, width, _) = ims[0].shape
    writer = cv2.VideoWriter(filename, fourcc, fps, (width, height))
    for im in ims:
        writer.write(im)
    writer.release()

def _softmax(x):
    max_x = np.max(x)
    exp_x = np.exp(x - max_x)
    return exp_x / np.sum(exp_x)
