# Supplementary material
Source: ML conference proceedings conference paper supplement (https://proceedings.neurips.cc/paper_files/paper/2021/hash/d7b76edf790923bf7177f7ebba5978df-Abstract.html)
Supplement: Supplementary file 1 [file d7b76edf790923bf7177f7ebba5978df-Supplemental.zip › MME/mme/policies/__init__.py]

from .nn_policy import NNPolicy
from .uniform_policy import UniformPolicy
from .gaussian_policy import GaussianPolicy
