# Supplementary material
Source: ML conference proceedings conference paper supplement (https://proceedings.neurips.cc/paper_files/paper/2021/hash/d7b76edf790923bf7177f7ebba5978df-Abstract.html)
Supplement: Supplementary file 1 [file d7b76edf790923bf7177f7ebba5978df-Supplemental.zip › MME/mme/preprocessors/mlp_preprocessor.py]

import tensorflow as tf

from rllab.core.serializable import Serializable

from sandbox.rocky.tf.core.parameterized import Parameterized

from mme.misc.mlp import MLPFunction
from mme.misc import tf_utils

class MLPPreprocessor(MLPFunction):
    def __init__(self, env_spec, layer_sizes=(128, 16),
                 output_nonlinearity=None, name='observations_preprocessor'):

        Parameterized.__init__(self)
        Serializable.quick_init(self, locals())

        self._name = name

        self._Do = env_spec.observation_space.flat_dim

        obs_ph = tf.placeholder(
            tf.float32,
            shape=(None, self._Do),
            name='observations',
        )

        self._input_pls = (obs_ph, )
        self._layer_sizes = layer_sizes
        self._output_nonlinearity = output_nonlinearity

        self._output_t = self.get_output_for(obs_ph, reuse=tf.AUTO_REUSE)
