# Supplementary material
Source: ML conference proceedings conference paper supplement (https://proceedings.neurips.cc/paper_files/paper/2021/hash/d7b76edf790923bf7177f7ebba5978df-Abstract.html)
Supplement: Supplementary file 1 [file d7b76edf790923bf7177f7ebba5978df-Supplemental.zip › MME/mme/replay_buffers/replay_buffer.py]

import abc


class ReplayBuffer(object, metaclass=abc.ABCMeta):
    """
    A class used to save and replay data.
    """

    @abc.abstractmethod
    def add_sample(self, observation, action, reward, next_observation,
                   terminal, **kwargs):
        """
        Add a transition tuple.
        """
        pass

    @abc.abstractmethod
    def terminate_episode(self):
        """
        Let the replay buffer know that the episode has terminated in case some
        special book-keeping has to happen.
        :return:
        """
        pass

    @property
    @abc.abstractmethod
    def size(self, **kwargs):
        """
        :return: # of unique items that can be sampled.
        """
        pass

    def add_path(self, path):
        """
        Add a path to the replay buffer.

        This default implementation naively goes through every step, but you
        may want to optimize this.

        NOTE: You should NOT call "terminate_episode" after calling add_path.
        It's assumed that this function handles the episode termination.

        :param path: Dict like one outputted by railrl.samplers.util.rollout
        """
        for i, (
                obs,
                action,
                reward,
                next_obs,
                terminal,
                agent_info,
                env_info
        ) in enumerate(zip(
            path["observations"],
            path["actions"],
            path["rewards"],
            path["next_observations"],
            path["terminals"],
            path["agent_infos"],
            path["env_infos"],
        )):
            self.add_sample(
                obs,
                action,
                reward,
                terminal,
                next_obs,
                agent_info=agent_info,
                env_info=env_info,
            )
        self.terminate_episode()

    @abc.abstractmethod
    def random_batch(self, batch_size):
        """
        Return a batch of size `batch_size`.
        :param batch_size:
        :return:
        """
        pass
