# Supplementary material
Source: ML conference proceedings conference paper supplement (https://proceedings.neurips.cc/paper_files/paper/2021/hash/d7b76edf790923bf7177f7ebba5978df-Abstract.html)
Supplement: Supplementary file 1 [file d7b76edf790923bf7177f7ebba5978df-Supplemental.zip › MME/mme/replay_buffers/simple_replay_buffer.py]

import numpy as np

from rllab.core.serializable import Serializable

from .replay_buffer import ReplayBuffer
from rllab.misc.overrides import overrides


class SimpleReplayBuffer(ReplayBuffer, Serializable):
    def __init__(self, env_spec, max_replay_buffer_size):
        super(SimpleReplayBuffer, self).__init__()
        Serializable.quick_init(self, locals())

        max_replay_buffer_size = int(max_replay_buffer_size)

        self._env_spec = env_spec
        self._observation_dim = env_spec.observation_space.flat_dim
        self._action_dim = env_spec.action_space.flat_dim
        self._max_buffer_size = max_replay_buffer_size
        self._observations = np.zeros((max_replay_buffer_size,
                                       self._observation_dim))
        self._observations_2d = np.zeros((max_replay_buffer_size,
                                       2))
        # It's a bit memory inefficient to save the observations twice,
        # but it makes the code *much* easier since you no longer have to
        # worry about termination conditions.
        self._next_obs = np.zeros((max_replay_buffer_size,
                                   self._observation_dim))
        self._actions = np.zeros((max_replay_buffer_size, self._action_dim))
        self._rewards = np.zeros(max_replay_buffer_size)
        self._times = np.zeros(max_replay_buffer_size)
        # self._terminals[i] = a terminal was received at time i
        self._terminals = np.zeros(max_replay_buffer_size, dtype='uint8')
        self._top = 0
        self._size = 0
        self._counts = None

    def add_sample(self, observation, action, reward, terminal,
                   next_observation, time=None, **kwargs):
        self._observations[self._top] = observation
        self._observations_2d[self._top] = observation[:2]
        self._actions[self._top] = action
        self._rewards[self._top] = reward
        self._terminals[self._top] = terminal
        self._next_obs[self._top] = next_observation
        if time is not None:
            self._times[self._top] = time

        self._advance()

    def terminate_episode(self):
        pass

    def _advance(self):
        self._top = (self._top + 1) % self._max_buffer_size
        if self._size < self._max_buffer_size:
            self._size += 1

    def random_batch(self, batch_size):
        indices = np.random.randint(0, self._size, batch_size)
        return dict(
            observations=self._observations[indices],
            observations_2d=self._observations_2d[indices],
            actions=self._actions[indices],
            rewards=self._rewards[indices],
            terminals=self._terminals[indices],
            next_observations=self._next_obs[indices],
        )

    @property
    def size(self):
        return self._size

    def __getstate__(self):
        d = super(SimpleReplayBuffer, self).__getstate__()
        d.update(dict(
            o=self._observations.tobytes(),
            a=self._actions.tobytes(),
            r=self._rewards.tobytes(),
            t=self._terminals.tobytes(),
            no=self._next_obs.tobytes(),
            top=self._top,
            size=self._size,
        ))
        return d

    def __setstate__(self, d):
        super(SimpleReplayBuffer, self).__setstate__(d)
        self._observations = np.fromstring(d['o']).reshape(
            self._max_buffer_size, -1
        )
        self._next_obs = np.fromstring(d['no']).reshape(
            self._max_buffer_size, -1
        )
        self._actions = np.fromstring(d['a']).reshape(self._max_buffer_size, -1)
        self._rewards = np.fromstring(d['r']).reshape(self._max_buffer_size)
        self._terminals = np.fromstring(d['t'], dtype=np.uint8)
        self._top = d['top']
        self._size = d['size']
