# Supplementary material
Source: ML conference proceedings conference paper supplement (https://proceedings.neurips.cc/paper_files/paper/2021/hash/d7b76edf790923bf7177f7ebba5978df-Abstract.html)

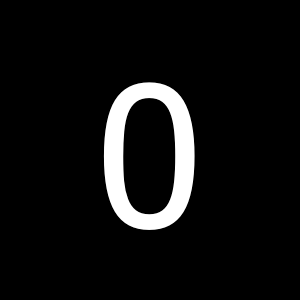

Supplement: Supplementary file 1 [file d7b76edf790923bf7177f7ebba5978df-Supplemental.zip › MME/mme/envs/assets/muj_imgs/n0.png]

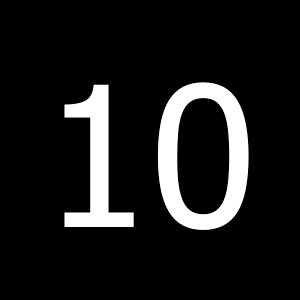

Supplement: Supplementary file 1 [file d7b76edf790923bf7177f7ebba5978df-Supplemental.zip › MME/mme/envs/assets/muj_imgs/n10.png]

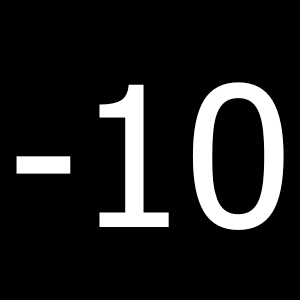

Supplement: Supplementary file 1 [file d7b76edf790923bf7177f7ebba5978df-Supplemental.zip › MME/mme/envs/assets/muj_imgs/n10min.png]

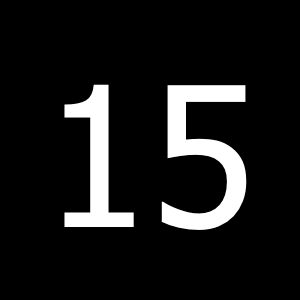

Supplement: Supplementary file 1 [file d7b76edf790923bf7177f7ebba5978df-Supplemental.zip › MME/mme/envs/assets/muj_imgs/n15.png]

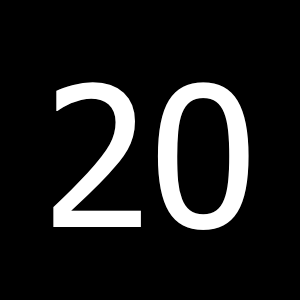

Supplement: Supplementary file 1 [file d7b76edf790923bf7177f7ebba5978df-Supplemental.zip › MME/mme/envs/assets/muj_imgs/n20.png]

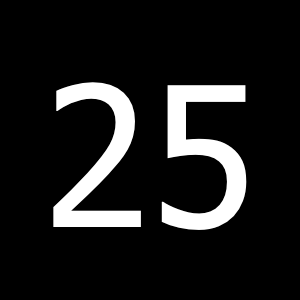

Supplement: Supplementary file 1 [file d7b76edf790923bf7177f7ebba5978df-Supplemental.zip › MME/mme/envs/assets/muj_imgs/n25.png]

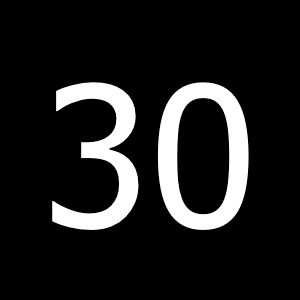

Supplement: Supplementary file 1 [file d7b76edf790923bf7177f7ebba5978df-Supplemental.zip › MME/mme/envs/assets/muj_imgs/n30.png]

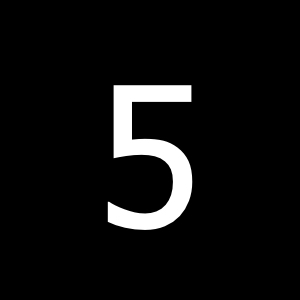

Supplement: Supplementary file 1 [file d7b76edf790923bf7177f7ebba5978df-Supplemental.zip › MME/mme/envs/assets/muj_imgs/n5.png]

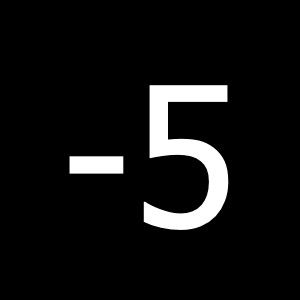

Supplement: Supplementary file 1 [file d7b76edf790923bf7177f7ebba5978df-Supplemental.zip › MME/mme/envs/assets/muj_imgs/n5min.png]
